# Supplementary material for: Analysis of Neutralization Titers against SARS-CoV-2 in Health-Care Workers Vaccinated with Prime-Boost mRNA–mRNA or Vector–mRNA COVID-19 Vaccines
Source: MDPI journal article supplement (doi:10.3390/vaccines10010075), 2022-01-04
Supplement: s1 [file s1]

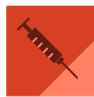**Supplementary Table S1: Summary of 98 subjects receiving mRNA-mRNA prime-boost vaccination with Comirnaty® (BioNTech-Pfizer, Mainz, Germany/New York, United States)**

| Patient ID   | Age (years)  | Sex             | SARS-COV-2 WNTAI ELISA Baseline |             |          | SARS-COV-2 WNTAI ELISA 1M post 2nd vaccination |             |          | 1M post 2nd vaccination ID <sub>50</sub> | Time between 1. and 2. vaccination (days) | Time between 2. vaccination and blood sample (days) |
|--------------|--------------|-----------------|---------------------------------|-------------|----------|------------------------------------------------|-------------|----------|------------------------------------------|-------------------------------------------|-----------------------------------------------------|
|              |              |                 | OD <sub>450nm</sub>             | Ratio (S/N) | Ab       | OD <sub>450nm</sub>                            | Ratio (S/N) | Ab       |                                          |                                           |                                                     |
| V-01         | 75           | Male            | 0.02                            | 0.2         | Negative | 3.88                                           | 168.7       | Positive | 2114                                     | 36                                        | 28                                                  |
| V-02         | 67           | Male            | 0.01                            | 0.1         | Negative | 3.59                                           | 156.3       | Positive | 101                                      | 33                                        | 31                                                  |
| V-03         | 46           | Male            | 0.00                            | 0.0         | Negative | 4.06                                           | 176.6       | Positive | 3704                                     | 34                                        | 30                                                  |
| V-04         | 54           | Male            | 0.01                            | 0.0         | Negative | 3.99                                           | 173.5       | Positive | 722                                      | 31                                        | 36                                                  |
| V-05         | 41           | Female          | 0.03                            | 0.3         | Negative | 3.91                                           | 170.2       | Positive | 2031                                     | 34                                        | 32                                                  |
| V-06         | 58           | Female          | 0.03                            | 0.2         | Negative | 3.95                                           | 172.0       | Positive | 4941                                     | 33                                        | 31                                                  |
| V-07         | 36           | Female          | 0.05                            | 0.4         | Negative | 3.94                                           | 171.6       | Positive | 2599                                     | 27                                        | 38                                                  |
| V-08         | 66           | Female          | 0.05                            | 1.0         | Negative | 4.00                                           | 173.9       | Positive | 547                                      | 36                                        | 39                                                  |
| V-09         | 55           | Female          | 0.01                            | 0.0         | Negative | 3.87                                           | 168.2       | Positive | 2734                                     | 33                                        | 33                                                  |
| V-10         | 33           | Female          | 0.00                            | 0.0         | Negative | 4.03                                           | 175.3       | Positive | 1920                                     | 33                                        | 41                                                  |
| V-11         | 48           | Female          | 0.04                            | 1.0         | Negative | 4.07                                           | 58.0        | Positive | 6643                                     | 34                                        | 31                                                  |
| V-12         | 37           | Female          | 0.00                            | 0.0         | Negative | 3.96                                           | 172.5       | Positive | 1716                                     | 33                                        | 32                                                  |
| V-13         | 49           | Female          | 0.00                            | 0.0         | Negative | 3.98                                           | 173.0       | Positive | 1259                                     | 34                                        | 31                                                  |
| V-14         | 36           | Male            | 0.00                            | 0.0         | Negative | 3.79                                           | 164.8       | Positive | 8243                                     | 33                                        | 41                                                  |
| V-15         | 42           | Female          | 0.00                            | 0.0         | Negative | 3.86                                           | 168.0       | Positive | 1105                                     | 33                                        | 41                                                  |
| V-16         | 38           | Male            | 0.01                            | 0.0         | Negative | 3.89                                           | 169.3       | Positive | 1978                                     | 33                                        | 41                                                  |
| V-18         | 62           | Female          | 0.04                            | 0.1         | Negative | 3.99                                           | 173.4       | Positive | 11872                                    | 33                                        | 35                                                  |
| V-19         | 48           | Female          | 0.00                            | 0.0         | Negative | 3.93                                           | 170.9       | Positive | 4709                                     | 34                                        | 30                                                  |
| V-20         | 52           | Female          | 0.00                            | 0.3         | Negative | 4.00                                           | 173.9       | Positive | 1840                                     | 36                                        | 28                                                  |
| V-21         | 36           | Male            | 0.01                            | 0.0         | Negative | 4.09                                           | 178.1       | Positive | 10536                                    | 36                                        | 31                                                  |
| V-23         | 58           | Female          | 0.00                            | 0.0         | Negative | 3.94                                           | 171.5       | Positive | 1713                                     | 34                                        | 34                                                  |
| V-24         | 49           | Female          | 0.01                            | 0.1         | Negative | 3.90                                           | 169.7       | Positive | 1926                                     | 34                                        | 33                                                  |
| V-26         | 60           | Male            | 0.01                            | 0.0         | Negative | 3.97                                           | 172.8       | Positive | 1215                                     | 33                                        | 33                                                  |
| V-27         | 48           | Female          | 0.10                            | 0.1         | Negative | 4.02                                           | 175.1       | Positive | 4356                                     | 30                                        | 35                                                  |
| V-28         | 60           | Female          | 0.02                            | 0.1         | Negative | 4.08                                           | 177.6       | Positive | 12316                                    | 36                                        | 30                                                  |
| V-29         | 58           | Female          | 0.00                            | 0.9         | Negative | 3.93                                           | 171.0       | Positive | 3718                                     | 34                                        | 30                                                  |
| V-30         | 33           | Female          | 0.00                            | 0.1         | Negative | 3.99                                           | 173.6       | Positive | 1438                                     | 34                                        | 31                                                  |
| V-31         | 49           | Male            | 0.00                            | 0.0         | Negative | 3.99                                           | 173.7       | Positive | 2653                                     | 33                                        | 34                                                  |
| V-32         | 31           | Female          | 0.01                            | 0.0         | Negative | 3.99                                           | 173.8       | Positive | 2498                                     | 33                                        | 54                                                  |
| V-33         | 55           | Male            | 0.01                            | 0.0         | Negative | 3.83                                           | 166.8       | Positive | 743                                      | 33                                        | 31                                                  |
| V-34         | 65           | Male            | 0.04                            | 0.6         | Negative | 3.91                                           | 55.0        | Positive | 239                                      | 19                                        | 48                                                  |
| V-35         | 53           | Male            | 0.01                            | 0.1         | Negative | 3.92                                           | 170.5       | Positive | 3740                                     | 34                                        | 32                                                  |
| V-36         | 33           | Female          | 0.01                            | 0.1         | Negative | 3.92                                           | 170.6       | Positive | 3872                                     | 33                                        | 32                                                  |
| V-37         | 64           | Female          | 0.01                            | 0.1         | Negative | 3.97                                           | 172.8       | Positive | 6831                                     | 31                                        | 34                                                  |
| V-38         | 52           | Female          | 0.01                            | 0.1         | Negative | 3.91                                           | 170.2       | Positive | 15142                                    | 31                                        | 35                                                  |
| V-39         | 53           | Female          | 0.01                            | 0.1         | Negative | 4.00                                           | 174.2       | Positive | 2523                                     | 34                                        | 30                                                  |
| V-42         | 33           | Male            | 0.09                            | 0.1         | Negative | 3.95                                           | 171.7       | Positive | 4632                                     | 32                                        | 39                                                  |
| V-43         | 29           | Male            | 0.01                            | 0.1         | Negative | 4.02                                           | 174.8       | Positive | 2615                                     | 31                                        | 40                                                  |
| V-44         | 62           | Male            | 0.03                            | 0.8         | Negative | 3.81                                           | 165.7       | Positive | 1519                                     | 31                                        | 33                                                  |
| V-45         | 66           | Male            | 0.05                            | 0.1         | Negative | 3.95                                           | 171.9       | Positive | 3165                                     | 31                                        | 33                                                  |
| V-46         | 34           | Male            | 0.03                            | 0.3         | Negative | 3.98                                           | 173.2       | Positive | 5138                                     | 34                                        | 31                                                  |
| V-47         | 73           | Male            | 0.01                            | 0.5         | Negative | 4.00                                           | 173.9       | Positive | 1809                                     | 31                                        | 33                                                  |
| V-48         | 38           | Female          | 0.00                            | 0.3         | Negative | 4.10                                           | 178.2       | Positive | 4582                                     | 32                                        | 37                                                  |
| V-49         | 25           | Female          | 0.05                            | 0.1         | Negative | 4.06                                           | 176.4       | Positive | 11633                                    | 31                                        | 40                                                  |
| V-50         | 35           | Female          | 0.07                            | 0.0         | Negative | 4.04                                           | 175.7       | Positive | 6872                                     | 31                                        | 38                                                  |
| V-51         | 43           | Male            | 0.07                            | 0.5         | Negative | 4.00                                           | 174.1       | Positive | 1539                                     | 32                                        | 30                                                  |
| V-52         | 39           | Female          | 0.04                            | 0.6         | Negative | 4.11                                           | 57.0        | Positive | 5384                                     | 31                                        | 35                                                  |
| V-53         | 61           | Female          | 0.04                            | 0.6         | Negative | 4.10                                           | 56.9        | Positive | 670                                      | 31                                        | 35                                                  |
| V-54         | 49           | Female          | 0.05                            | 0.6         | Negative | 4.06                                           | 56.4        | Positive | 1680                                     | 34                                        | 28                                                  |
| V-56         | 42           | Male            | 0.06                            | 0.9         | Negative | 4.05                                           | 56.3        | Positive | 8002                                     | 31                                        | 35                                                  |
| V-57         | 25           | Male            | 0.05                            | 0.7         | Negative | 3.90                                           | 54.1        | Positive | 3029                                     | 34                                        | 31                                                  |
| V-59         | 26           | Male            | 0.07                            | 1.0         | Negative | 4.04                                           | 56.0        | Positive | 3530                                     | 32                                        | 32                                                  |
| V-60         | 57           | Female          | 0.04                            | 0.6         | Negative | 3.97                                           | 55.2        | Positive | 5489                                     | 31                                        | 31                                                  |
| V-61         | 63           | Female          | 0.04                            | 0.6         | Negative | 3.96                                           | 55.0        | Positive | 2315                                     | 31                                        | 32                                                  |
| V-62         | 34           | Female          | 0.11                            | 1.5         | Negative | 4.07                                           | 58.0        | Positive | 3928                                     | 22                                        | 41                                                  |
| V-63         | 48           | Male            | 0.05                            | 0.7         | Negative | 4.04                                           | 56.0        | Positive | 2780                                     | 31                                        | 34                                                  |
| V-64         | 24           | Female          | 0.04                            | 0.6         | Negative | 4.19                                           | 60.0        | Positive | 3238                                     | 31                                        | 39                                                  |
| V-65         | 40           | Female          | 0.04                            | 0.6         | Negative | 4.12                                           | 57.3        | Positive | 2577                                     | 31                                        | 34                                                  |
| V-66         | 34           | Female          | 0.05                            | 0.6         | Negative | 4.05                                           | 56.3        | Positive | 14976                                    | 32                                        | 30                                                  |
| V-67         | 32           | Female          | 0.07                            | 0.9         | Negative | 4.06                                           | 56.4        | Positive | 2503                                     | 31                                        | 32                                                  |
| V-68         | 34           | Female          | 0.07                            | 0.9         | Negative | 3.93                                           | 54.6        | Positive | 1609                                     | 34                                        | 44                                                  |
| V-69         | 29           | Female          | 0.04                            | 0.6         | Negative | 4.05                                           | 56.3        | Positive | 1302                                     | 32                                        | 31                                                  |
| V-70         | 27           | Female          | 2.64                            | 59.0        | Positive | 4.05                                           | 56.3        | Positive | 10195                                    | 34                                        | 30                                                  |
| V-71         | 29           | Female          | 0.08                            | 1.1         | Negative | 4.01                                           | 55.6        | Positive | 5222                                     | 34                                        | 31                                                  |
| V-72         | 48           | Female          | 0.05                            | 0.7         | Negative | 4.12                                           | 57.2        | Positive | 4389                                     | 34                                        | 31                                                  |
| V-73         | 50           | Female          | 0.06                            | 0.8         | Negative | 4.15                                           | 57.6        | Positive | 1218                                     | 34                                        | 29                                                  |
| V-76         | 37           | Female          | 0.04                            | 1.0         | Negative | 4.19                                           | 58.2        | Positive | 3210                                     | 31                                        | 30                                                  |
| V-78         | 38           | Male            | 0.04                            | 1.0         | Negative | 4.17                                           | 58.0        | Positive | 4330                                     | 33                                        | 30                                                  |
| V-79         | 48           | Female          | 0.08                            | 1.0         | Negative | 4.03                                           | 55.9        | Positive | 1957                                     | 33                                        | 32                                                  |
| V-80         | 54           | Female          | 0.04                            | 1.0         | Negative | 4.10                                           | 57.0        | Positive | 1455                                     | 32                                        | 33                                                  |
| V-82         | 33           | Female          | 0.04                            | 1.0         | Negative | 4.11                                           | 57.0        | Positive | 2190                                     | 31                                        | 37                                                  |
| V-83         | 34           | Female          | 0.04                            | 0.6         | Negative | 4.04                                           | 56.1        | Positive | 1012                                     | 30                                        | 33                                                  |
| V-84         | 27           | Female          | 0.08                            | 1.1         | Negative | 4.12                                           | 57.2        | Positive | 1464                                     | 30                                        | 32                                                  |
| V-85         | 37           | Male            | 0.09                            | 1.3         | Negative | 4.05                                           | 56.3        | Positive | 4262                                     | 33                                        | 32                                                  |
| V-86         | 37           | Female          | 0.05                            | 0.6         | Negative | 4.04                                           | 56.1        | Positive | 1840                                     | 30                                        | 34                                                  |
| V-87         | 70           | Male            | 0.05                            | 0.7         | Negative | 3.85                                           | 53.4        | Positive | 140                                      | 31                                        | 33                                                  |
| V-88         | 63           | Female          | 0.05                            | 0.8         | Negative | 3.99                                           | 55.4        | Positive | 753                                      | 31                                        | 30                                                  |
| V-89         | 34           | Female          | 0.04                            | 0.6         | Negative | 4.03                                           | 55.9        | Positive | 4052                                     | 33                                        | 31                                                  |
| V-90         | 56           | Female          | 0.08                            | 1.0         | Negative | 4.05                                           | 56.2        | Positive | 1663                                     | 33                                        | 30                                                  |
| V-91         | 43           | Female          | 0.05                            | 0.7         | Negative | 3.99                                           | 55.4        | Positive | 851                                      | 31                                        | 32                                                  |
| V-92         | 33           | Female          | 0.04                            | 0.6         | Negative | 4.11                                           | 57.0        | Positive | 2991                                     | 31                                        | 38                                                  |
| V-93         | 50           | Female          | 0.06                            | 0.9         | Negative | 4.08                                           | 58.3        | Positive | 3079                                     | 33                                        | 36                                                  |
| V-94         | 23           | Female          | 0.04                            | 0.6         | Negative | 4.09                                           | 56.8        | Positive | 11612                                    | 44                                        | 28                                                  |
| V-95         | 26           | Female          | 0.05                            | 0.6         | Negative | 4.05                                           | 56.3        | Positive | 4753                                     | 34                                        | 33                                                  |
| V-96         | 26           | Female          | 0.06                            | 0.8         | Negative | 3.92                                           | 54.5        | Positive | 3241                                     | 30                                        | 31                                                  |
| V-97         | 52           | Female          | 0.08                            | 1.1         | Negative | 4.04                                           | 56.1        | Positive | 3167                                     | 30                                        | 31                                                  |
| V-98         | 32           | Male            | 0.04                            | 1.0         | Negative | 4.05                                           | 56.2        | Positive | 1748                                     | 30                                        | 34                                                  |
| V-99         | 57           | Male            | 0.06                            | 0.8         | Negative | 4.05                                           | 56.2        | Positive | 2103                                     | 30                                        | 35                                                  |
| V-100        | 55           | Female          | 0.05                            | 0.7         | Negative | 4.28                                           | 59.4        | Positive | 2210                                     | 31                                        | 33                                                  |
| V-101        | 25           | Male            | 0.04                            | 1.0         | Negative | 4.08                                           | 56.7        | Positive | 754                                      | 27                                        | 30                                                  |
| V-102        | 58           | Female          | 0.04                            | 1.0         | Negative | 4.16                                           | 57.8        | Positive | 3314                                     | 36                                        | 51                                                  |
| V-103        | 40           | Male            | 0.04                            | 1.0         | Negative | 4.17                                           | 107.0       | Positive | 2334                                     | 33                                        | 47                                                  |
| V-104        | 59           | Male            | 0.04                            | 1.0         | Negative | 4.10                                           | 104.9       | Positive | 2182                                     | 30                                        | 31                                                  |
| V-105        | 30           | Female          | 0.04                            | 1.0         | Negative | 4.10                                           | 105.2       | Positive | 2526                                     | 32                                        | 32                                                  |
| V-106        | 27           | Female          | 0.04                            | 1.0         | Negative | 4.00                                           | 102.2       | Positive | 1041                                     | 34                                        | 39                                                  |
| V-107        | 38           | Female          | 0.04                            | 1.0         | Negative | 4.00                                           | 101.5       | Positive | 1940                                     | 33                                        | 33                                                  |
| V-108        | 46           | Male            | 0.04                            | 1.0         | Negative | 4.00                                           | 101.0       | Positive | 832                                      | 34                                        | 34                                                  |
| V-109        | 23           | Female          | 0.04                            | 1.0         | Negative | 4.00                                           | 103.5       | Positive | 2038                                     | 36                                        | 32                                                  |
| Mean (SD)    | 44.3 (13.3)  | Male 32 (33%)   | Negative 97 (99%)               |             |          |                                                |             |          | 3518.5 (3145.1)                          | 32.3 (2.8)                                | 34.0 (4.8)                                          |
| Median (IQR) | 43 (33 - 55) | Female 66 (67%) | Positive 1 (1%)                 |             |          |                                                |             |          | 2525 (1667.3 - 4313.0)                   | 33 (31 - 34)                              | 33 (31 - 35)                                        |

Ab= antibody, OD= optical density, ELISA= enzyme-linked immunosorbent assay, S/N= signal/noise, ID50= 50% inhibitory dilution, SD=standard deviation, IQR= interquartile range, 1M = 1 month.

**Supplementary Table S2: Summary of 16 subjects receiving prime vaccination with Vaxzevria® and boost vaccination with Comirnaty® (BioNTech-Pfizer, Mainz, Germany/New York, United States) or Spikevax® (Moderna, Cambridge, United States)**

| Patient ID   | Age (years)  | Sex            | SARS-COV-2 WANTAI ELISA Baseline |             |                   | SARS-COV-2 WANTAI ELISA 1M post 2nd vaccination |       |          | 1M post 1st vaccination ID <sub>50</sub> | 1M post 2nd vaccination ID <sub>50</sub> | Time between 1. and 2. vaccination (days) | Time between 2. vaccination and blood sample (days) | Booster vaccine             |
|--------------|--------------|----------------|----------------------------------|-------------|-------------------|-------------------------------------------------|-------|----------|------------------------------------------|------------------------------------------|-------------------------------------------|-----------------------------------------------------|-----------------------------|
|              |              |                | OD <sub>450nm-620nm</sub>        | Ratio (S/N) | Ab                | OD <sub>450nm-620nm</sub>                       | Ratio | Ab       |                                          |                                          |                                           |                                                     |                             |
| V-110        | 29           | Female         | 0.04                             | 1.0         | Negative          | 3.4                                             | 87.9  | Positive | 153                                      | 3589                                     | 73                                        | 33                                                  | BNT162b2/Comirnaty®         |
| V-111        | 54           | Female         | 0.04                             | 1.0         | Negative          | 3.6                                             | 91.1  | Positive | 134                                      | 6102                                     | 93                                        | 33                                                  | Moderna mRNA-1273/Spikevax® |
| V-112        | 27           | Male           | 0.04                             | 1.0         | Negative          | 0.4                                             | 10.9  | Positive | 152                                      | 1811                                     | 68                                        | 50                                                  | BNT162b2/Comirnaty®         |
| V-115        | 27           | Female         | 0.04                             | 1.0         | Negative          | 2.5                                             | 64.8  | Positive | 133                                      | 4744                                     | 89                                        | 34                                                  | BNT162b2/Comirnaty®         |
| V-116        | 28           | Female         | 0.12                             | 2.7         | Positive          | 3.8                                             | 98.5  | Positive | 862                                      | 10466                                    | 80                                        | 32                                                  | BNT162b2/Comirnaty®         |
| V-117        | 40           | Male           | 0.04                             | 1.0         | Negative          | 3.4                                             | 86.2  | Positive | 235                                      | 3228                                     | 83                                        | 28                                                  | BNT162b2/Comirnaty®         |
| V-118        | 28           | Male           | 0.04                             | 1.0         | Negative          | 3.8                                             | 98.7  | Positive | 609                                      | 8498                                     | 48                                        | 37                                                  | BNT162b2/Comirnaty®         |
| V-119        | 30           | Male           | 0.04                             | 1.0         | Negative          | 1.6                                             | 40.1  | Positive | 311                                      | 3409                                     | 71                                        | 45                                                  | BNT162b2/Comirnaty®         |
| V-120        | 59           | Male           | 0.04                             | 1.0         | Negative          | 3.7                                             | 94.9  | Positive | 127                                      | 5211                                     | 78                                        | 34                                                  | BNT162b2/Comirnaty®         |
| V-123        | 31           | Female         | 0.04                             | 1.0         | Negative          | 1.6                                             | 40.7  | Positive | 67                                       | 7297                                     | 89                                        | 31                                                  | BNT162b2/Comirnaty®         |
| V-124        | 27           | Male           | 0.05                             | 1.1         | Negative          | 1.4                                             | 36.8  | Positive | 21                                       | 4651                                     | 76                                        | 54                                                  | BNT162b2/Comirnaty®         |
| V-126        | 35           | Male           | 0.04                             | 1.0         | Negative          | 1.4                                             | 36.7  | Positive | 67                                       | 730                                      | 68                                        | 40                                                  | BNT162b2/Comirnaty®         |
| V-127        | 35           | Male           | 0.04                             | 1.0         | Negative          | 3.3                                             | 85.5  | Positive | 54                                       | 3192                                     | 93                                        | 28                                                  | BNT162b2/Comirnaty®         |
| V-128        | 44           | Female         | 0.04                             | 1.0         | Negative          | 2.6                                             | 68.1  | Positive | 132                                      | 5895                                     | 81                                        | 33                                                  | BNT162b2/Comirnaty®         |
| V-129        | 35           | Female         | 0.05                             | 1.1         | Negative          | 4.1                                             | 106.4 | Positive | 375                                      | 12257                                    | 77                                        | 33                                                  | BNT162b2/Comirnaty®         |
| V-130        | 46           | Female         | 0.04                             | 1.0         | Negative          | 1.4                                             | 36.2  | Positive | 169                                      | 8141                                     | 93                                        | 22                                                  | BNT162b2/Comirnaty®         |
| Mean (SD)    | 36 (10.06)   | Male 8 (50%)   |                                  |             | Negative 15 (94%) |                                                 |       |          | 225.1 (224.0)                            | 5576.3 (3121.8)                          | 78.75 (11.9)                              | 36.69 (9.3)                                         |                             |
| Median (IQR) | 33 (28 - 41) | Female 8 (50%) |                                  |             | Positive 1 (6%)   |                                                 |       |          | 143 (112 - 254)                          | 4977.5 (3363.8 - 7508.0)                 | 79 (73 - 89)                              | 34 (32 - 41)                                        |                             |

Ab= antibody, OD= optical density, ELISA= enzyme-linked immunosorbent assay, S/N= signal/noise, ID50= 50% inhibitory dilution, SD=standard deviation, IQR= interquartile range, 1M = 1 month.

**Supplementary Table S3: Summary of 38 subjects included with mild COVID-19**

| Patient ID   | Age (years) | Sex    | SARS-COV-2 WANTAI ELISA Baseline |                 |          | Baseline timepoint (days post symptom onset) | ID <sub>50</sub> at baseline timepoint |
|--------------|-------------|--------|----------------------------------|-----------------|----------|----------------------------------------------|----------------------------------------|
|              |             |        | OD <sub>450nm-620nm</sub>        | Ratio (S/N)     | Ab       |                                              |                                        |
| M-01         | 25          | Female | 2,84                             | 15,0            | Positive | 23                                           | 395                                    |
| M-03         | 29          | Female | 1,51                             | 8,0             | Positive | 30                                           | 252                                    |
| M-04         | 56          | Male   | 3,09                             | 16,3            | Positive | 28                                           | 12013                                  |
| M-10         | 26          | Female | 3,13                             | 16,4            | Positive | 29                                           | 1045                                   |
| M-11         | 20          | Male   | 3,05                             | 16,0            | Positive | 42                                           | 166                                    |
| M-12         | 29          | Male   | 3,00                             | 15,8            | Positive | 33                                           | 699                                    |
| M-13         | 35          | Male   | 2,92                             | 15,4            | Positive | 42                                           | 366                                    |
| M-16         | 49          | Female | 3,20                             | 16,6            | Positive | 37                                           | 2435                                   |
| M-17         | 42          | Male   | 3,06                             | 16,1            | Positive | 24                                           | 937                                    |
| M-19         | 64          | Female | 0,76                             | 4,0             | Positive | 26                                           | 309                                    |
| M-30         | 44          | Female | 2,89                             | 15,2            | Positive | 27                                           | 10634                                  |
| M-32         | 56          | Female | 0,52                             | 2,7             | Positive | 28                                           | 112                                    |
| M-34         | 27          | Female | 3,04                             | 16,0            | Positive | 25                                           | 310                                    |
| M-38         | 33          | Female | 1,45                             | 7,6             | Positive | 29                                           | 406                                    |
| M-47         | 34          | Male   | 0,69                             | 3,7             | Positive | 42                                           | 158                                    |
| M-57         | 34          | Female | 3,10                             | 16,3            | Positive | 42                                           | 797                                    |
| M-65         | 42          | Male   | 3,92                             | 100,4           | Positive | 35                                           | 1001                                   |
| M-66         | 53          | Female | 4,13                             | 105,9           | Positive | 36                                           | 951                                    |
| M-67         | 23          | Male   | 3,88                             | 99,4            | Positive | 40                                           | 118                                    |
| M-68         | 24          | Male   | 3,65                             | 93,6            | Positive | 42                                           | 583                                    |
| M-69         | 48          | Female | 1,04                             | 26,8            | Positive | 33                                           | 98                                     |
| M-73         | 33          | Female | 3,36                             | 86,1            | Positive | 22                                           | 705                                    |
| M-77         | 45          | Male   | 4,05                             | 103,9           | Positive | 33                                           | 6254                                   |
| M-78         | 30          | Female | 3,88                             | 99,6            | Positive | 28                                           | 269                                    |
| M-79         | 44          | Male   | 2,84                             | 72,7            | Positive | 29                                           | 203                                    |
| M-80         | 49          | Female | 3,25                             | 83,4            | Positive | 21                                           | 276                                    |
| M-88         | 25          | Female | 3,40                             | 48,5            | Positive | 31                                           | 709                                    |
| M-90         | 34          | Female | 1,68                             | 37,6            | Positive | 36                                           | 1679                                   |
| M-91         | 41          | Male   | 1,41                             | 20,2            | Positive | 24                                           | 394                                    |
| M-92         | 19          | Female | 0,38                             | 5,4             | Positive | 29                                           | 37                                     |
| M-93         | 46          | Male   | 1,59                             | 22,7            | Positive | 21                                           | 130                                    |
| M-94         | 48          | Female | 2,97                             | 42,4            | Positive | 34                                           | 313                                    |
| M-95         | 35          | Female | 3,03                             | 43,2            | Positive | 36                                           | 357                                    |
| M-96         | 24          | Female | 3,85                             | 55,0            | Positive | 31                                           | 418                                    |
| M-97         | 35          | Female | 3,05                             | 43,5            | Positive | 28                                           | 376                                    |
| M-98         | 35          | Female | 4,07                             | 58,1            | Positive | 30                                           | 777                                    |
| M-100        | 57          | Female | 3,81                             | 54,4            | Positive | 31                                           | 509                                    |
| M-102        | 61          | Female | 3,64                             | 52,0            | Positive | 21                                           | 737                                    |
| Mean (SD)    |             |        | 38.5 (11.9)                      | Female 26 (67%) |          | 31.1 (6.3)                                   | 1229.4 (2594.3)                        |
| Median (IQR) |             |        | 30 (28 - 36)                     | Male 13 (33%)   |          | 30 (28 - 36)                                 | 395 (261 - 787)                        |

Ab= antibody, OD= optical density, ELISA= enzyme-linked immunosorbent assay, S/N= signal/noise, ID50= 50% inhibitory dilution, SD=standard deviation, IQR= interquartile range.
